# Supplementary material
Source: Royal Society of Chemistry journal article supplement (doi:10.1039/d6mh00939e)
Supplement: d6mh00939e1.pdf [file d6mh00939e1.pdf]

## *Supplementary information*

# Molecule-in-Memory: A Multiscale Guideline for Polymeric Tunnelling Layers Linking Molecular Motifs to Electrical Outcomes

Jin-Hyuk Kwon,<sup>†a,b</sup> Jeong-In Lee,<sup>†c</sup> Jonghee Lee,<sup>a,c</sup> Kenichi Chiba,<sup>d</sup> Yuji Shibasaki<sup>\*d</sup> and Min-Hoi Kim<sup>\*a,c</sup>

<sup>a</sup>Research Institute of Printed Electronics & 3D Printing, Industry University Cooperation Foundation, Hanbat National University, Daejeon 34158, Republic of Korea.

<sup>b</sup>Department of Electronics Engineering, Chungwoon University, Michuhol-gu, Incheon 22100, Republic of Korea.

<sup>c</sup>Department of Creative Convergence Engineering, Hanbat National University, Daejeon 34158, Republic of Korea.

<sup>d</sup>Department of Chemistry & Biological Sciences, Faculty of Science & Engineering, Iwate University, 4-3-5 Ueda, Morioka 020-8551, Japan.

\*Correspondence: Yuji Shibasaki (Email: [yshibasa@iwate-u.ac.jp](mailto:yshibasa@iwate-u.ac.jp)), Min-Hoi Kim (Email: [mhkim8@hanbat.ac.kr](mailto:mhkim8@hanbat.ac.kr)).

<sup>†</sup>These authors contributed equally to this work.

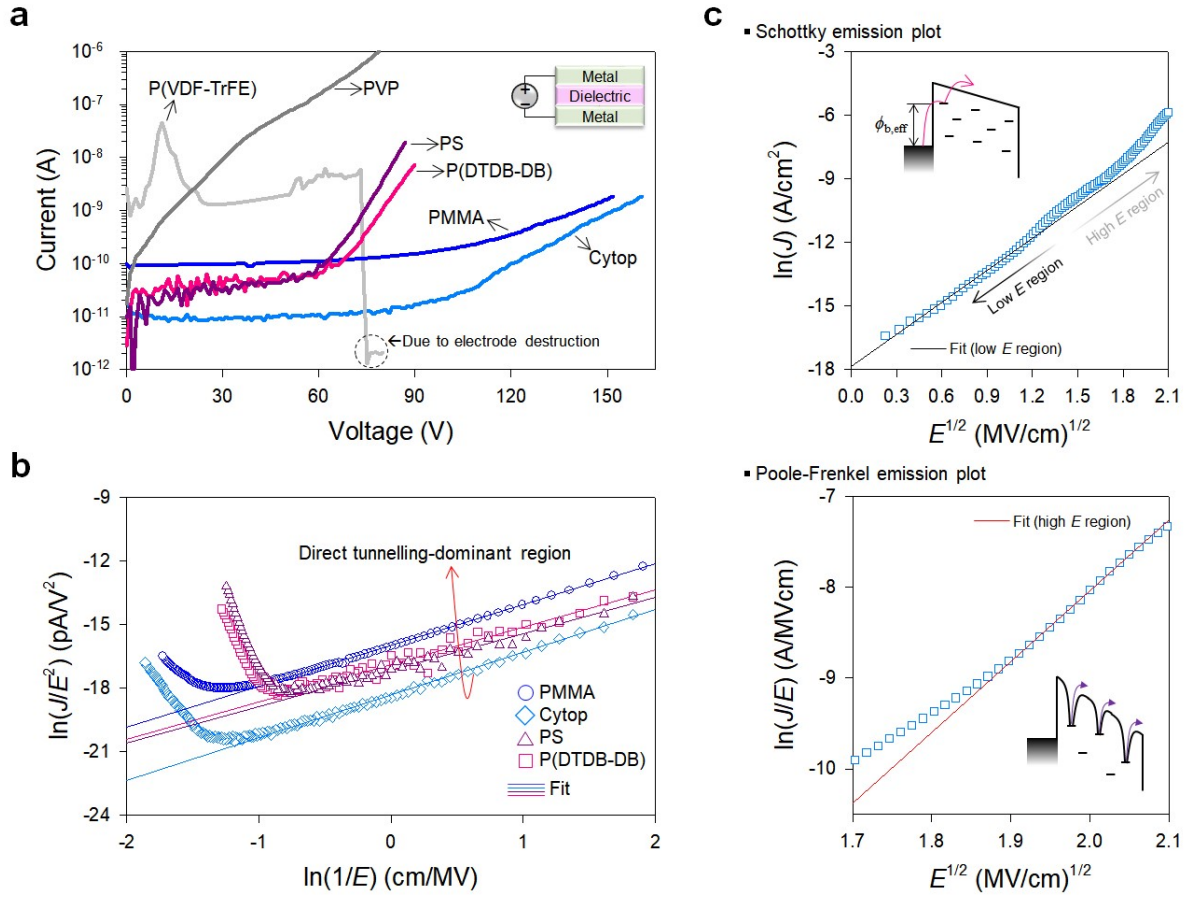

**Figure S1.** (a) Current-voltage characteristics of the MIM capacitors with PVP, P(VDF-TrFE), PMMA, Cytop, PS, and P(DTDB-DB) thin films as a function of the applied voltage, (b)  $\ln(J/E^2)$  vs.  $1/E$  plots of the PMMA, Cytop, PS, and P(DTDB-DB) capacitors, and (c) Schottky and Poole-Frenkel emission plots of the PVP capacitor.

The  $J_{\text{leak}}$  of the PVP capacitor was analyzed using the following relationships:

$$\text{Schottky emission: } J_S \propto \exp\left(-\frac{\phi_b - \beta_S \sqrt{E}}{k_B T}\right) \quad (1)$$

$$\text{Poole-Frenkel emission: } J_{PF} \propto E \exp\left(-\frac{\phi_t - \beta_{PF} \sqrt{E}}{k_B T}\right) \quad (2)$$

where  $\beta_S$  and  $\beta_{PF}$  are constants. The Schottky and Poole-Frenkel emission plots exhibited linear behaviours in the low and high electric field regions, respectively (**Figure S1c**). Accordingly, Schottky emission is considered the dominant mechanism for the low-field conduction, while Poole-Frenkel emission dominates the high-field conduction. The Poole-Frenkel behaviour indicates a high density of charge traps, which is attributed to hydroxyl groups attached to the repeat units of PVP.

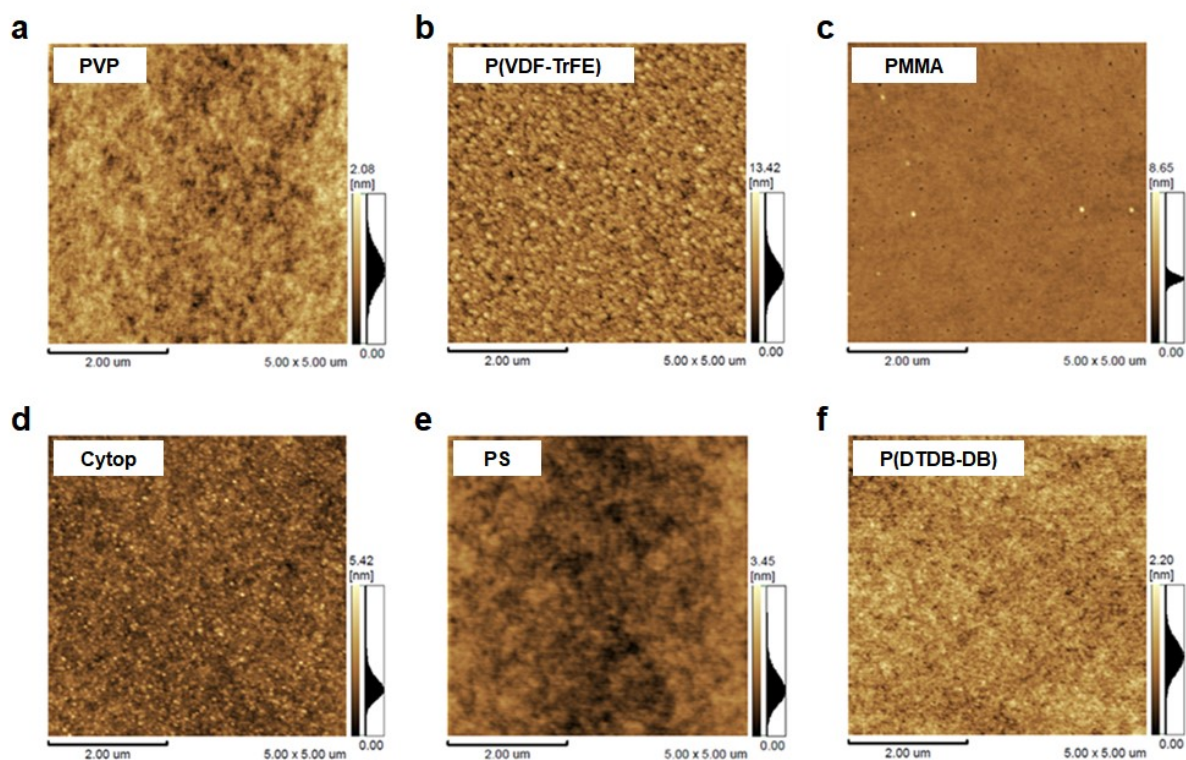

**Figure S2.** Atomic force microscopy images of (a) PVP, (b) P(VDF-TrFE), (c) PMMA, (d) Cytop, (e) PS, and (f) P(DTDB-DB) thin films.

The RMS surface roughness values of the PVP, P(VDF-TrFE), PMMA, Cytop, PS, and P(DTDB-DB) thin films were 0.2, 1.4, 0.2, 0.5, 0.3, and 0.2 nm, respectively.

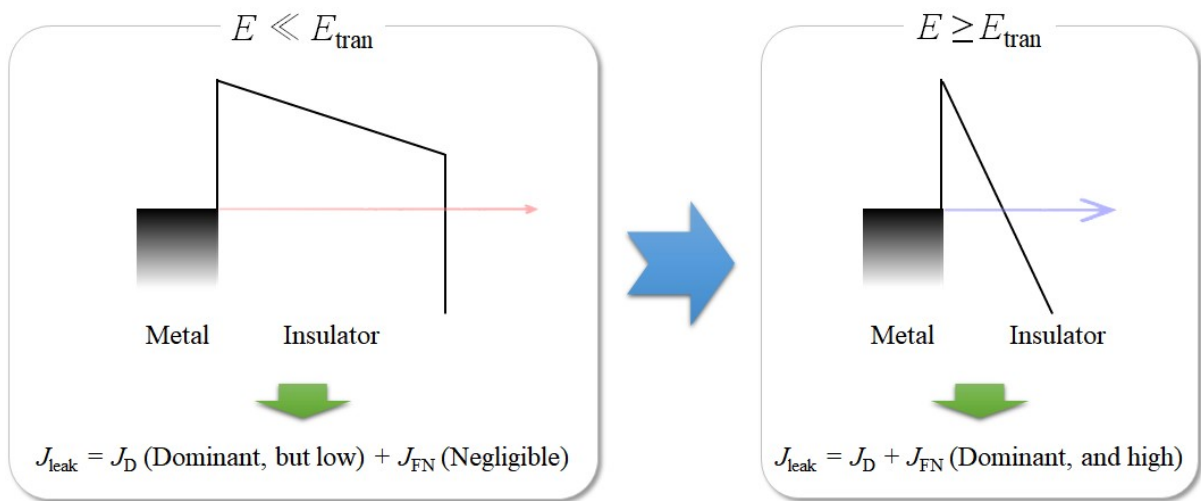

**Figure S3.** Conduction mechanism transition from direct tunnelling to FN tunnelling as a function of the applied electric field in the MIM capacitor ( $J_D$ : direct tunnelling current density).

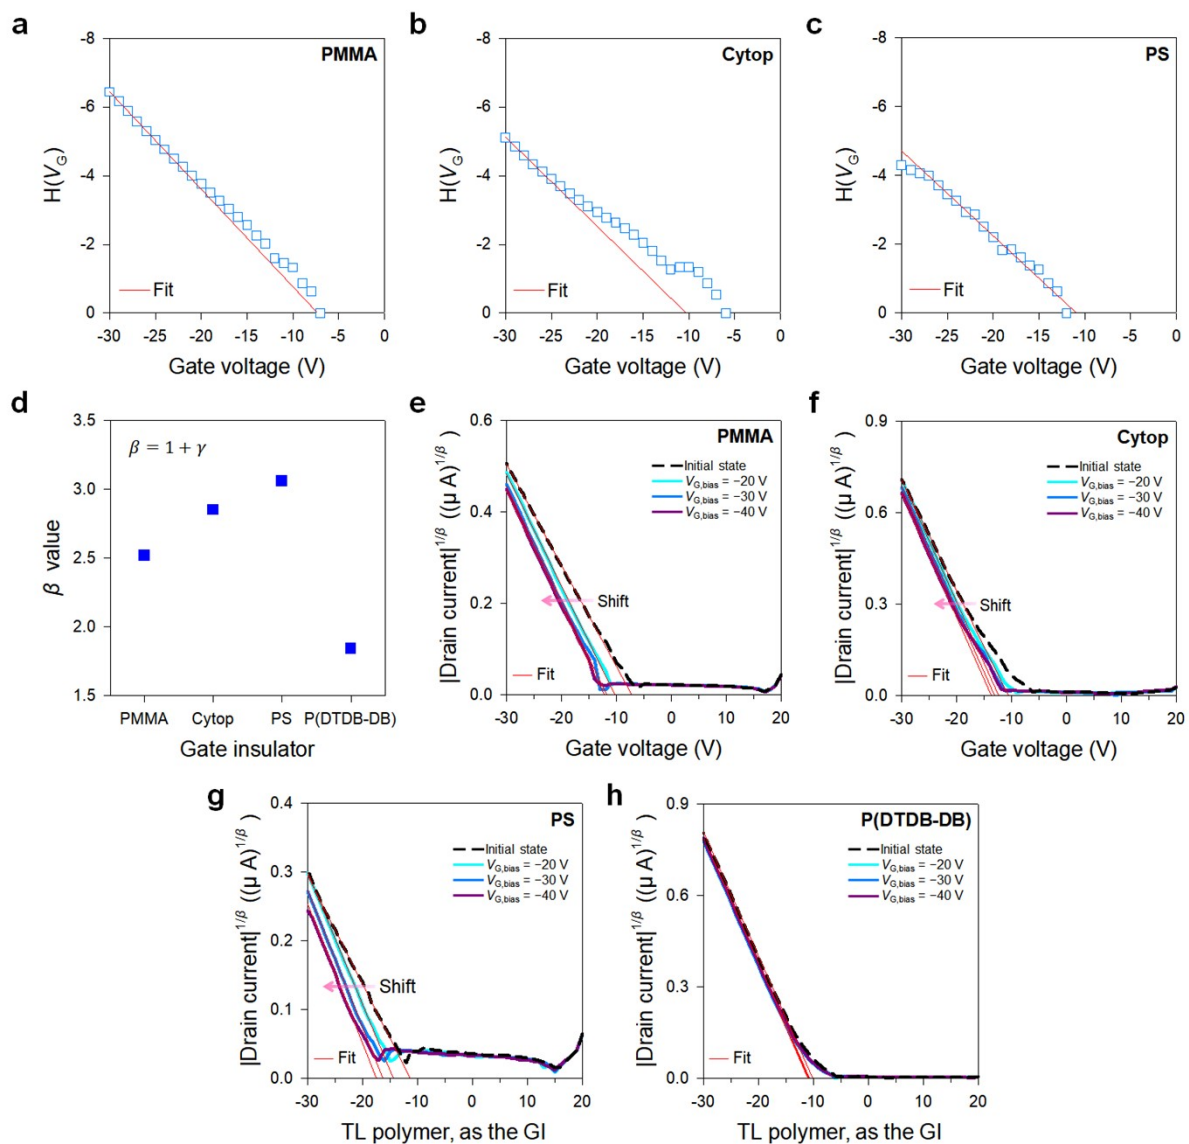

**Figure S4.** H-function analyses of the TFTs with (a) PMMA, (b) Cytop, and (c) PS as the GIs, (d)  $\beta$  values ( $\beta = 1 + \gamma$ ), and  $I_D^{1/\beta}$  vs.  $V_G$  plots of the transfer characteristic curves of the TFTs with (e) PMMA, (f) Cytop, (g) PS, and (h) P(DTDB-DB) as the GIs.

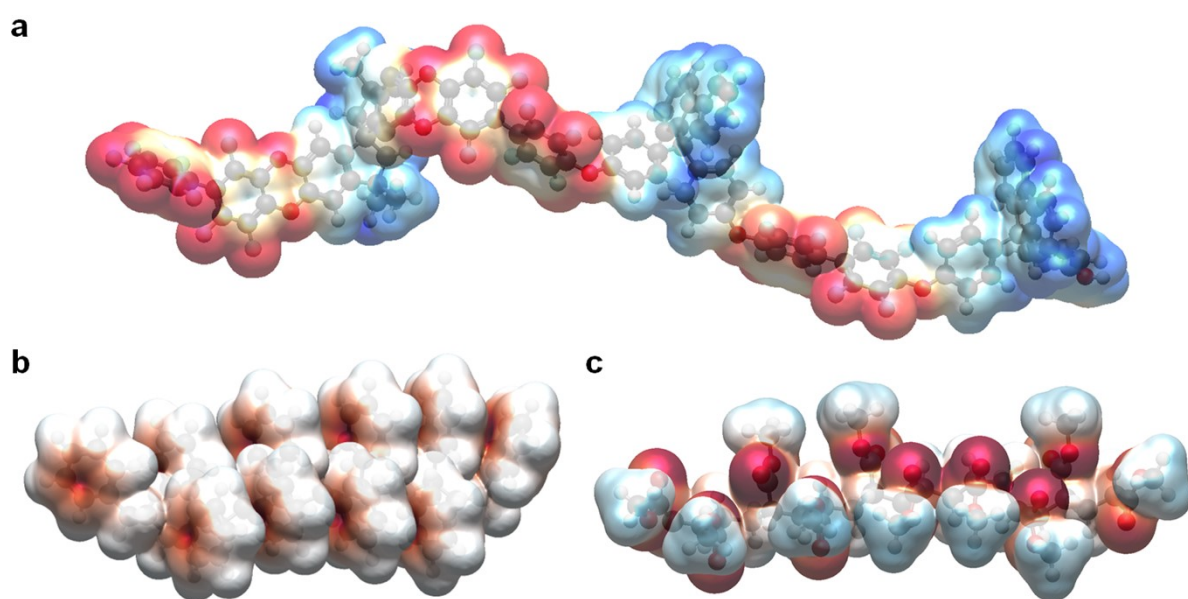

**Figure S5.** Electrostatic potential maps of partial P(DTDB-DB), PS, and PMMA structures, i.e., a ‘DTDB-DB’ structure, ten styrene units, and ten MMA units, respectively. Red and blue colors correspond to negative and positive electrostatic potential regions, respectively.

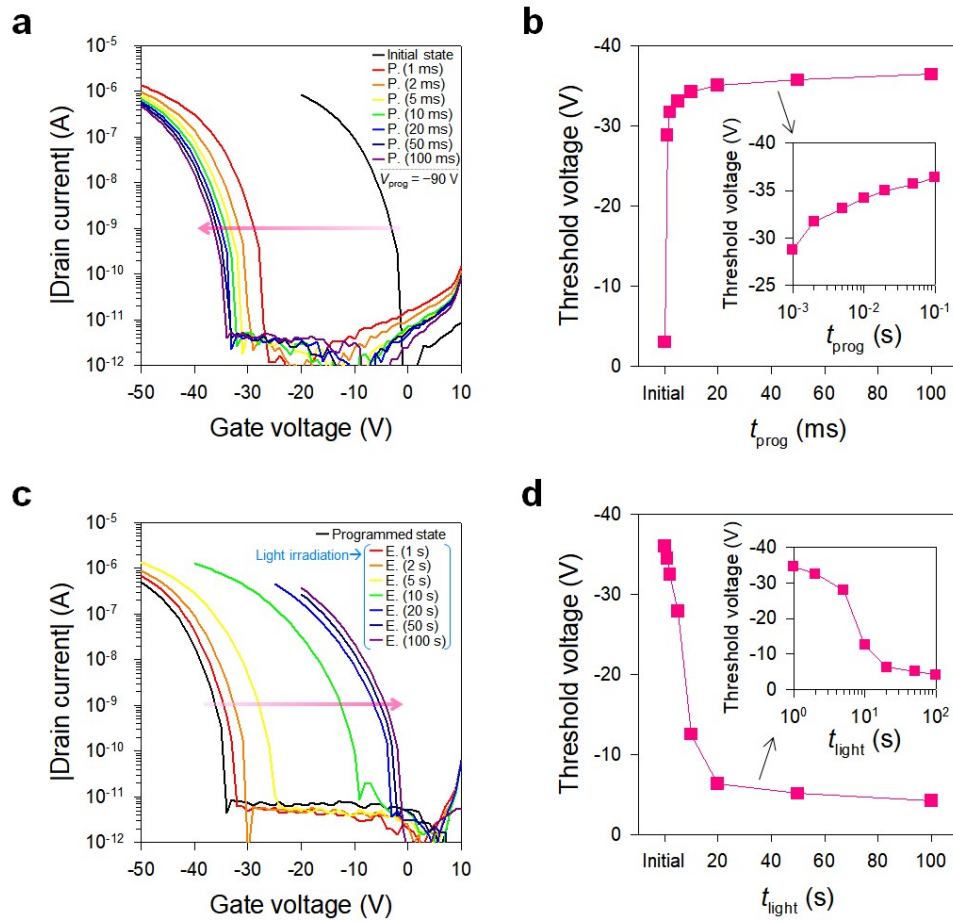

**Figure S6.** (a) Transfer characteristic curve shifts of the CTM with P(DTDB-DB) TL after program operations with  $V_{prog} = -90$  V for 1, 2, 5, 10, 20, 50, and 100 ms and (b) corresponding  $V_{th}$  values as a function of the programming time. (c) Transfer characteristic curve shifts of the CTM with P(DTDB-DB) TL after erase operations with light irradiation (white light) for 1, 2, 5, 10, 20, 50, and 100 s and (d) corresponding  $V_{th}$  values as a function of the erasing time.

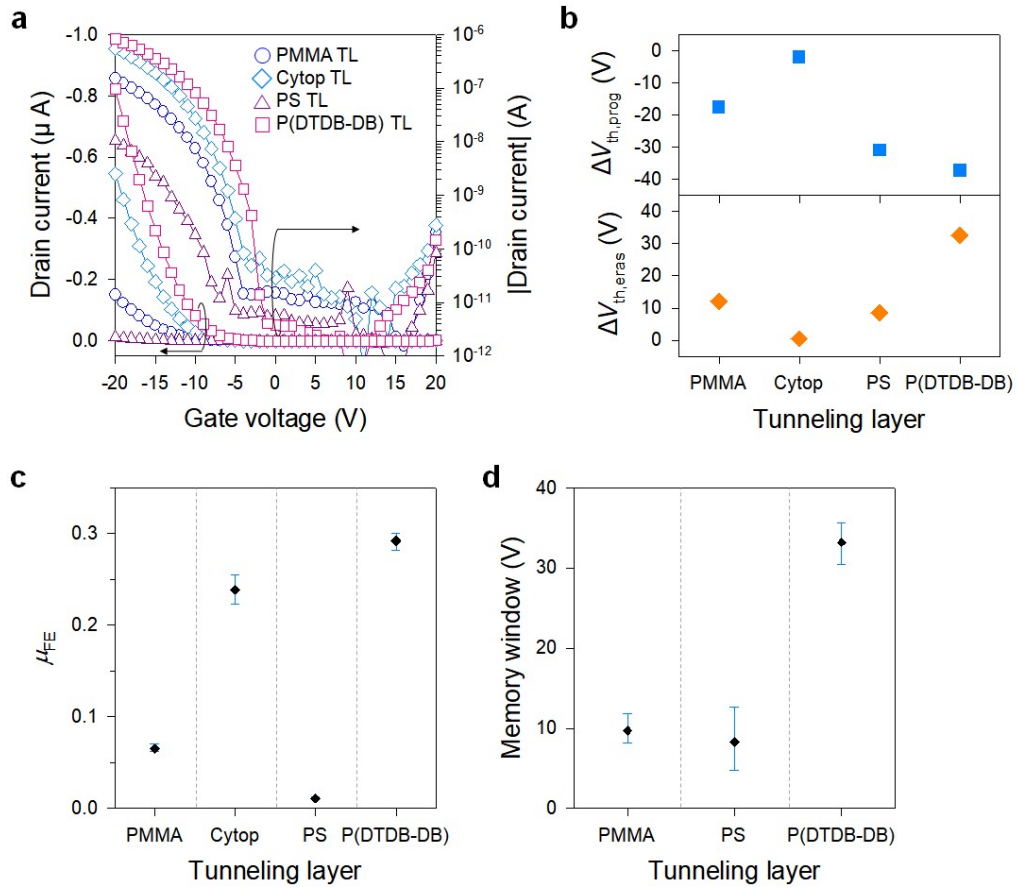

**Figure S7.** (a) Initial transfer characteristic curves of the CTMs with PMMA, Cytop, PS, and P(DTDB-DB) TLs at  $V_D = -5$  V. (b)  $\Delta V_{\text{th,prog}}$  and  $\Delta V_{\text{th,eras}}$  values of the CTMs after a program operation with  $V_{\text{prog}} = -90$  V (11 multiple pulses with a period of  $\sim 260$  ms) and an erase operation with light irradiation (white light), respectively. (c)  $\mu_{\text{FE}}$  (with error bars) and (d) memory window, i.e.,  $\Delta V_{\text{th,eras}}$  values (with error bars) of the CTMs with PMMA, Cytop, PS, and P(DTDB-DB) TLs.

The average  $\mu_{\text{FE}}$  values of the CTMs with PMMA, Cytop, PS, and P(DTDB-DB) TLs were  $0.065 \pm 0.003$ ,  $0.239 \pm 0.013$ ,  $0.011 \pm 0.001$ , and  $0.282 \pm 0.019$   $\text{cm}^2/\text{Vs}$ , respectively. The average memory window, i.e.,  $\Delta V_{\text{th,eras}}$  values of the CTMs with PMMA, PS, and P(DTDB-DB) TLs were  $9.7 \pm 1.4$ ,  $8.3 \pm 2.9$ , and  $33.2 \pm 1.7$  V, respectively.

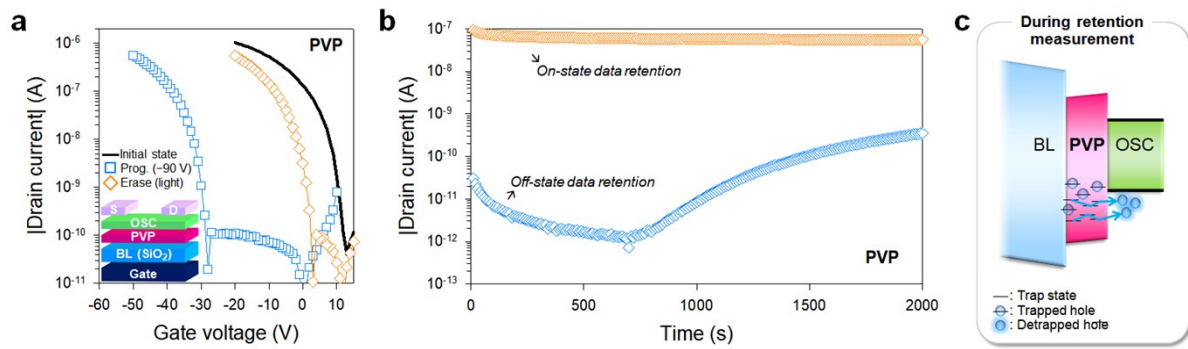

**Figure S8.** (a) Initial transfer characteristic curves of the CTM with a PVP layer at  $V_D = -5$  V, and those measured after a program operation with  $V_{\text{prog}} = -90$  V and an erase operation with light irradiation, (b) corresponding off-state and on-state data retention curves (at  $V_G = -10$  V and  $V_D = -5$  V), and (c) off-state data retention instability due to hole detrapping.

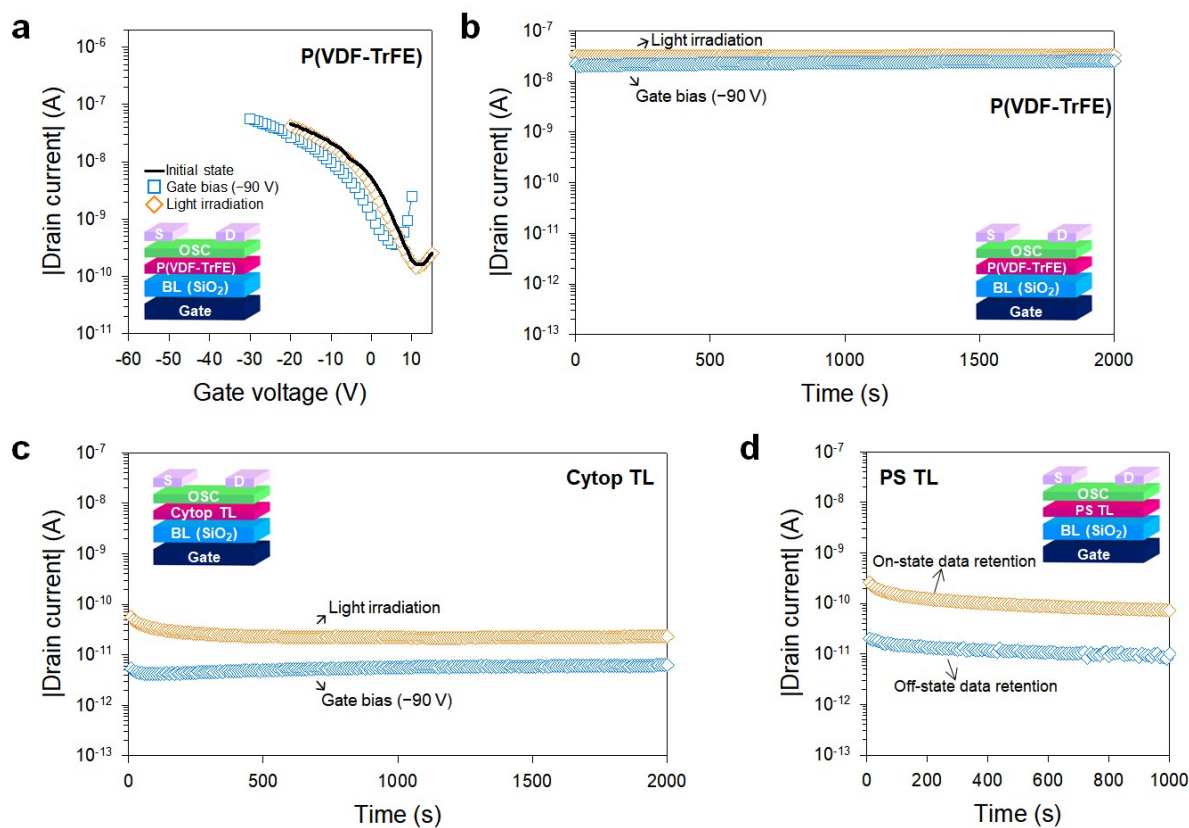

**Figure S9.** (a) Initial transfer characteristic curves of the CTM with a P(VDF-TrFE) layer, and those measured after the application of  $V_{G,bias} = -90$  V and after light irradiation, and (b) temporal  $I_D$  variations (at  $V_G = 5$  V and  $V_D = -5$  V) after the application of  $V_{G,bias} = -90$  V and after light irradiation (white light). (c) Temporal  $I_D$  variations of the CTM with a Cytop layer (at  $V_G = -5$  V and  $V_D = -5$  V) after the application of  $V_{G,bias} = -90$  V and after light irradiation. (d) Off-state and on-state data retention curves of the CTM with PS TL (at  $V_G = -36$  V and  $V_D = -5$  V) after programming with  $V_{prog} = -90$  V (11 multiple pulses with a period of  $\sim 260$  ms) and erasing with light irradiation (white light), respectively.

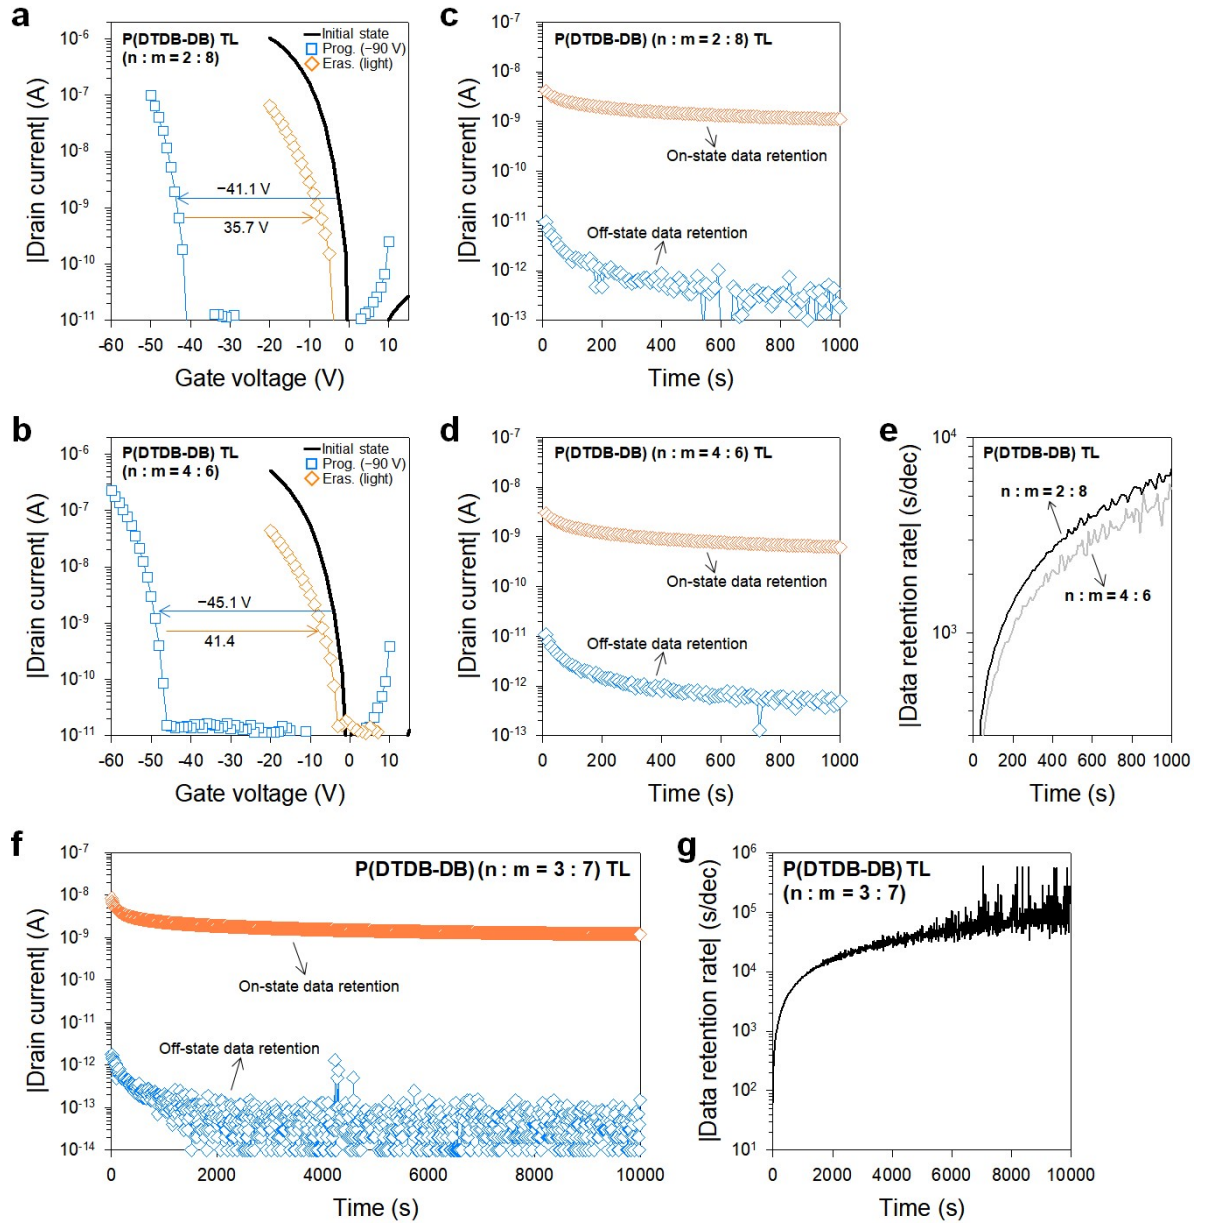

**Figure S10.** Initial transfer characteristic curves of the CTM with (a)  $n : m = 2 : 8$  or (b)  $n : m = 4 : 6$  P(DTDB-DB) TL at  $V_D = -5$  V, and those measured after a program operation with  $V_{\text{prog}} = -90$  V (11 multiple pulses with a period of  $\sim 270$  ms) and an erase operation with light irradiation (white light), (c, d) its data retention curves (at  $V_G = -10$  V and  $V_D = -5$  V), and (e)  $R_{\text{data}}$  of the on-state data retention curve. (f) Data retention curves of the CTM with P(DTDB-DB) ( $n : m = 3 : 7$ ) TL (at  $V_G = -10$  V and  $V_D = -5$  V) after programming with  $V_{\text{prog}} = -90$  V (11 multiple pulses with a period of  $\sim 260$  ms) and erasing with light irradiation (white light), respectively, and (g)  $R_{\text{data}}$  of the on-state data retention curve.

When P(DTDB-DB) with  $n : m = 2 : 8$  was used as the TL, the CTM exhibited memory characteristics

comparable to those of the CTM using P(DTDB-DB) with  $n : m = 3 : 7$ . However, the CTM using P(DTDB-DB) with  $n : m = 4 : 6$  exhibited a slight increase in memory window, while showing relatively poor retention characteristics. The increase in memory window may be related to a reduction in the bandgap [1], which requires further investigation. In addition, such a trade-off relationship between memory window and data retention stability has also been reported in a previous study [2].

## References

- [1] Y. Konno, R. Osuga, J. N. Kondo, R. Ye, T. Tsukamoto, Y. Oishi and Y. Shibasaki, *Polymer*, 2021, **230**, 124072.
- [2] S. P. Prakoso, H.-X. Peng, M.-N. Chen, Q.-A. Hong, R. Saleh and Y.-C. Chiu, *Adv. Funct. Mater.*, 2025, **35**, 2415415.

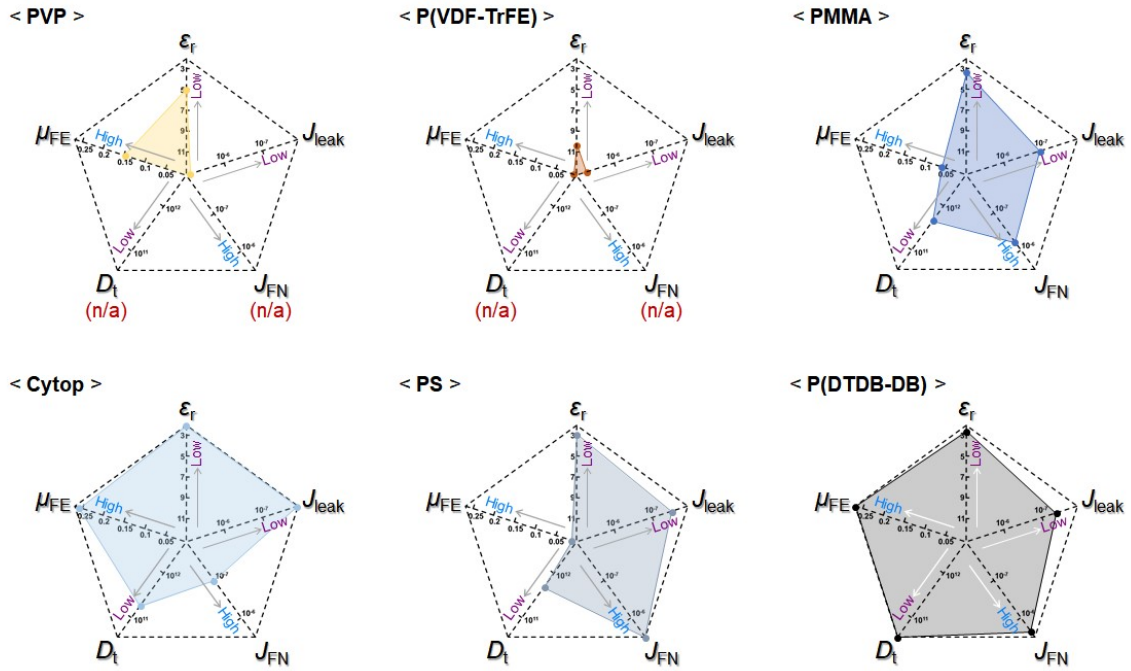

**Figure S11.** Radar charts displaying the  $\epsilon_r$ ,  $J_{\text{leak}}$ ,  $J_{\text{FN}}$ ,  $D_t$ , and  $\mu_{\text{FE}}$  values obtained from PVP, P(VDF-TrFE), PMMA, Cytop, PS, and P(DTDB-DB).

- The  $\epsilon_r$  values (at 1 kHz) of PVP, P(VDF-TrFE), PMMA, Cytop, PS, and P(DTDB-DB) are 5.0, 10.2, 3.4, 2.1, 2.9, and 2.6, respectively.
- The average  $J_{\text{leak}}$  values of the PVP, P(VDF-TrFE), PMMA, Cytop, PS, and P(DTDB-DB) capacitors, calculated over the electric-field range from 0 to 2 MV/cm, are  $7.7 \times 10^{-6}$ ,  $5.5 \times 10^{-6}$ ,  $1.1 \times 10^{-7}$ ,  $1.1 \times 10^{-8}$ ,  $3.0 \times 10^{-8}$ , and  $4.1 \times 10^{-8}$  A/cm<sup>2</sup>, respectively.
- The average  $J_{\text{FN}}$  values of the PMMA, Cytop, PS, and P(DTDB-DB) capacitors, calculated over the electric-field range from each  $E_{\text{tran}}$  to  $E_{\text{tran}} + 0.8$  MV/cm, are  $6.2 \times 10^{-7}$ ,  $1.0 \times 10^{-7}$ ,  $3.2 \times 10^{-6}$ , and  $2.3 \times 10^{-6}$  A/cm<sup>2</sup>, respectively.
- The  $D_t$  values for PMMA, Cytop, PS, and P(DTDB-DB), after the stress application with  $V_{\text{G,bias}} = -40$  V, are  $4.7 \times 10^{11}$ ,  $1.8 \times 10^{11}$ ,  $5.0 \times 10^{11}$ , and  $3.6 \times 10^{10}$  cm<sup>-2</sup>, respectively.
- The  $\mu_{\text{FE}}$  values of the CTMs with PVP, P(VDF-TrFE), PMMA, Cytop, PS, and P(DTDB-DB) are 0.15, 0.01, 0.06, 0.26, 0.01, and 0.27 cm<sup>2</sup>/Vs, respectively.
